# Supplementary material for: A non-B DNA binding peptidomimetic channel alters cellular functions
Source: PubMed Central journal article supplement (PMC11190219; doi:10.1038/s41467-024-49534-0), 2024-06-20
Supplement: 41467_2024_49534_MOESM3_ESM.pdf [file 41467_2024_49534_MOESM3_ESM.pdf]

## Description of Additional Supplementary Files

**File Name:** Supplementary Movie 1

**Description:** *MD simulation movie of Ion Transport via **TBP2** Gated Channel*

The movie provided along with the supporting information depicts the MD simulation representing passage of a sodium ion through the supramolecular assembly of **TBP2** molecules, embedded inside a POPC lipid membrane. The lipid molecules are not shown for clarity of representation. The sodium ion enters the ion channel; moves between successive **TBP2** molecules stacked upon each other and eventually get released.
